# Supplementary material for: MUS81 cleaves TOP1-derived lesions and other DNA–protein cross-links
Source: PubMed Central journal article supplement (PMC10189953; doi:10.1186/s12915-023-01614-1), 2023-05-16

**Figure 1**

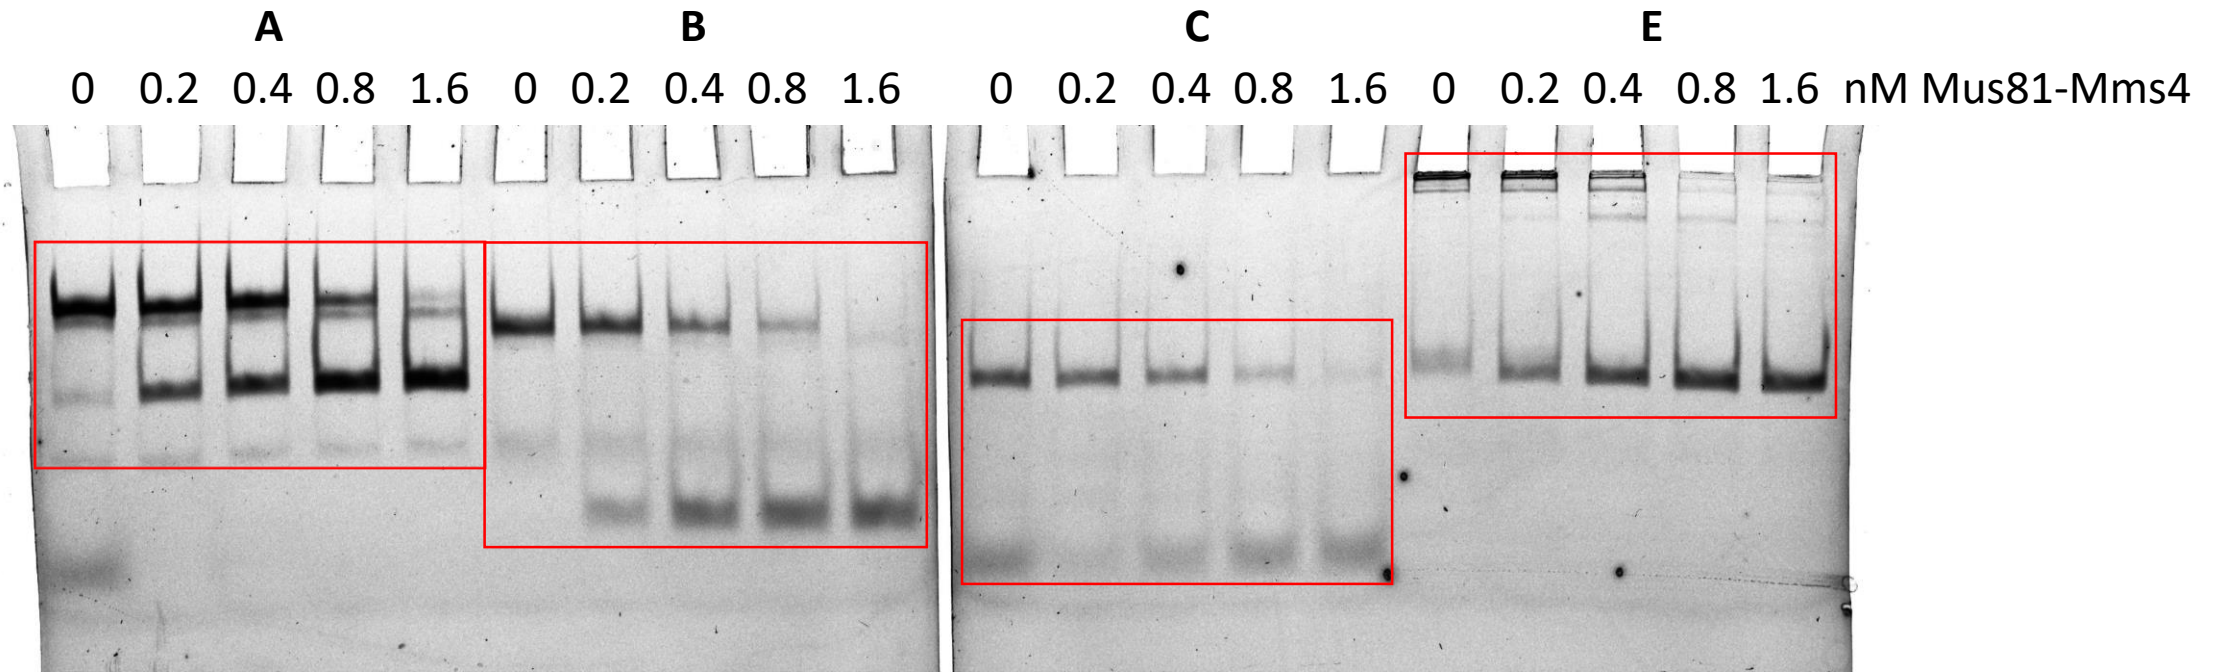

**Figure 1**

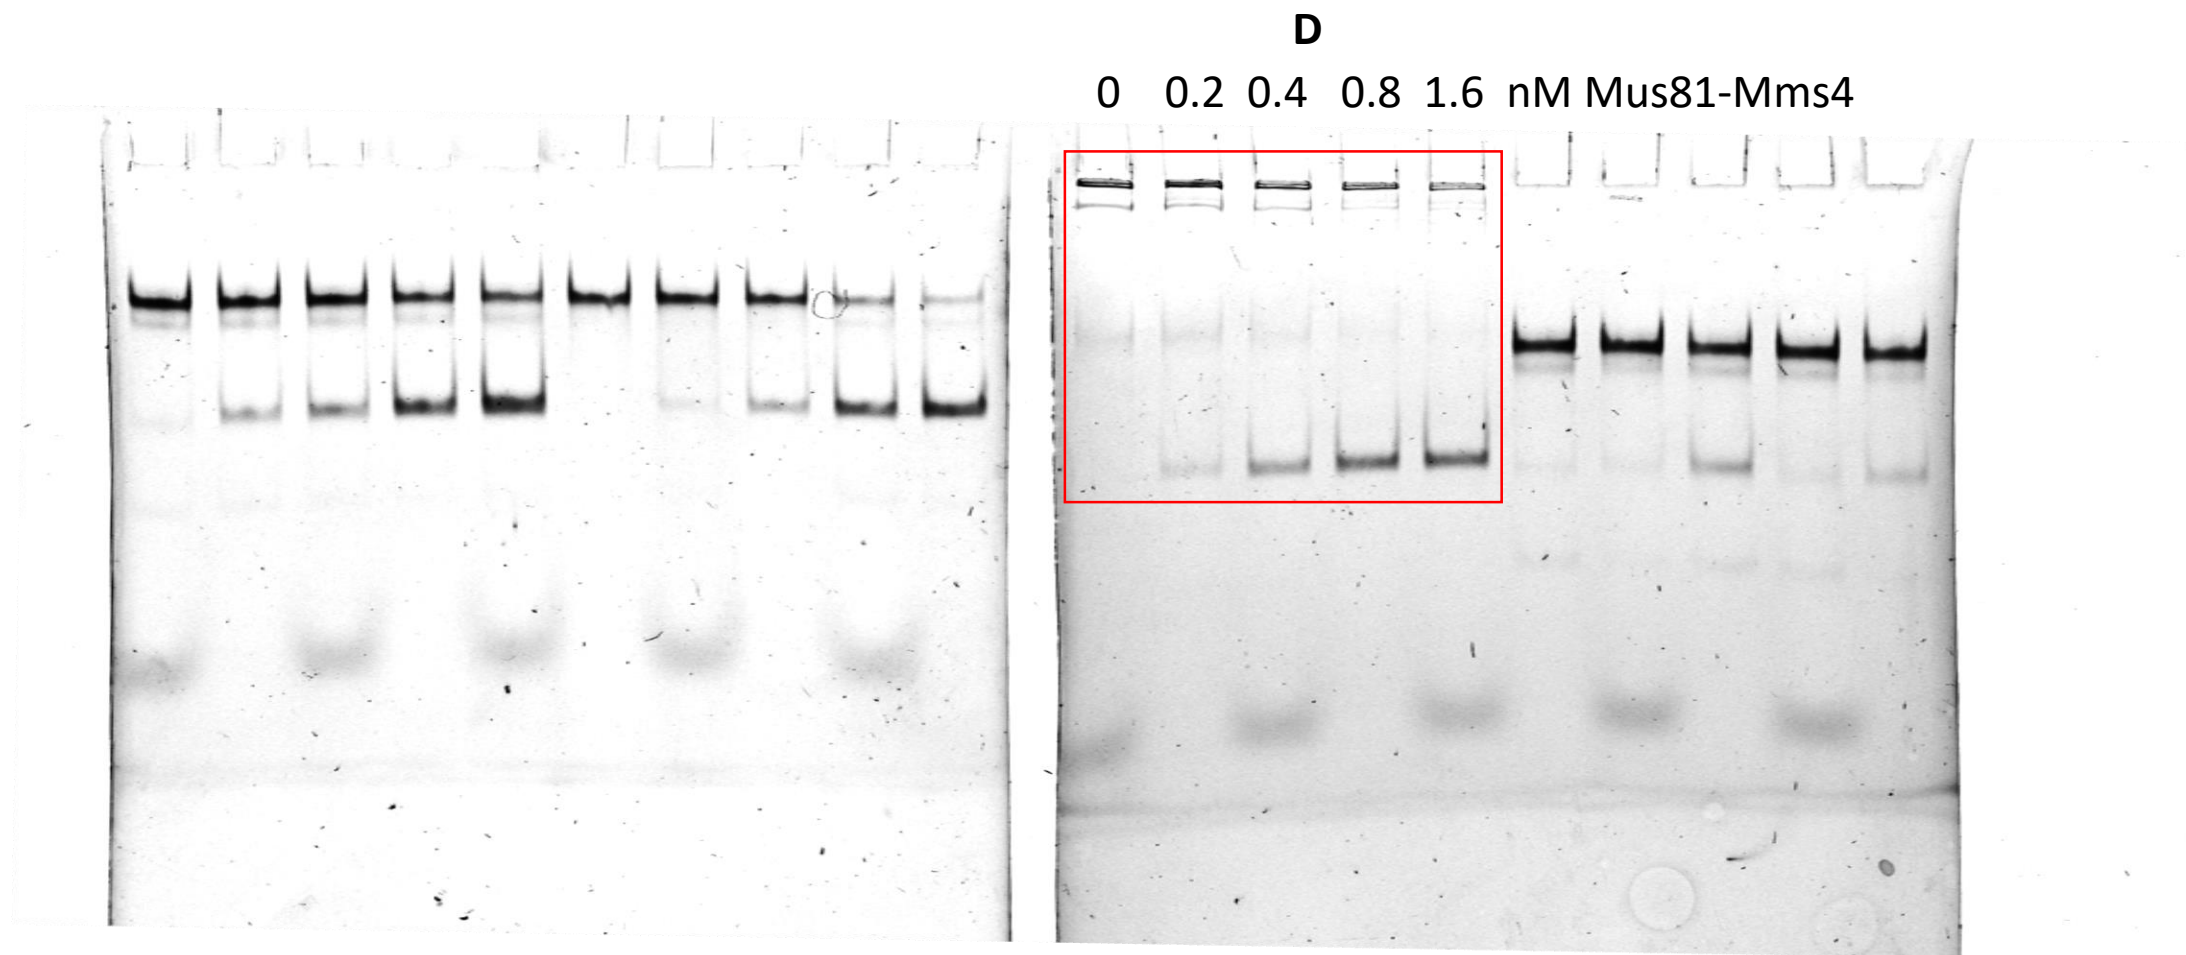

Figure 1

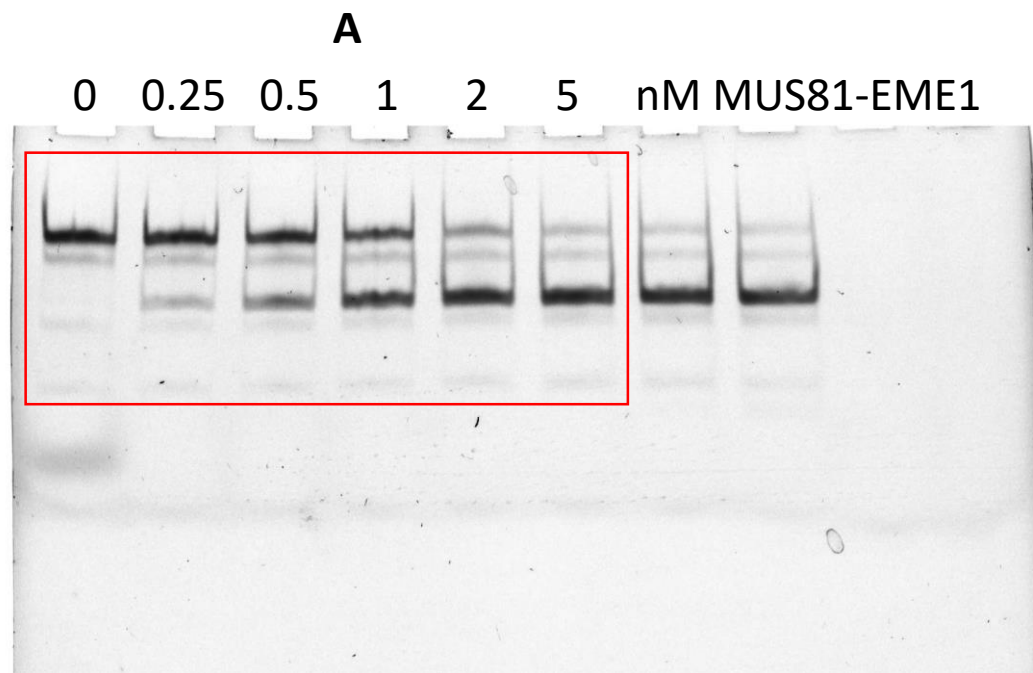

**Figure 1**

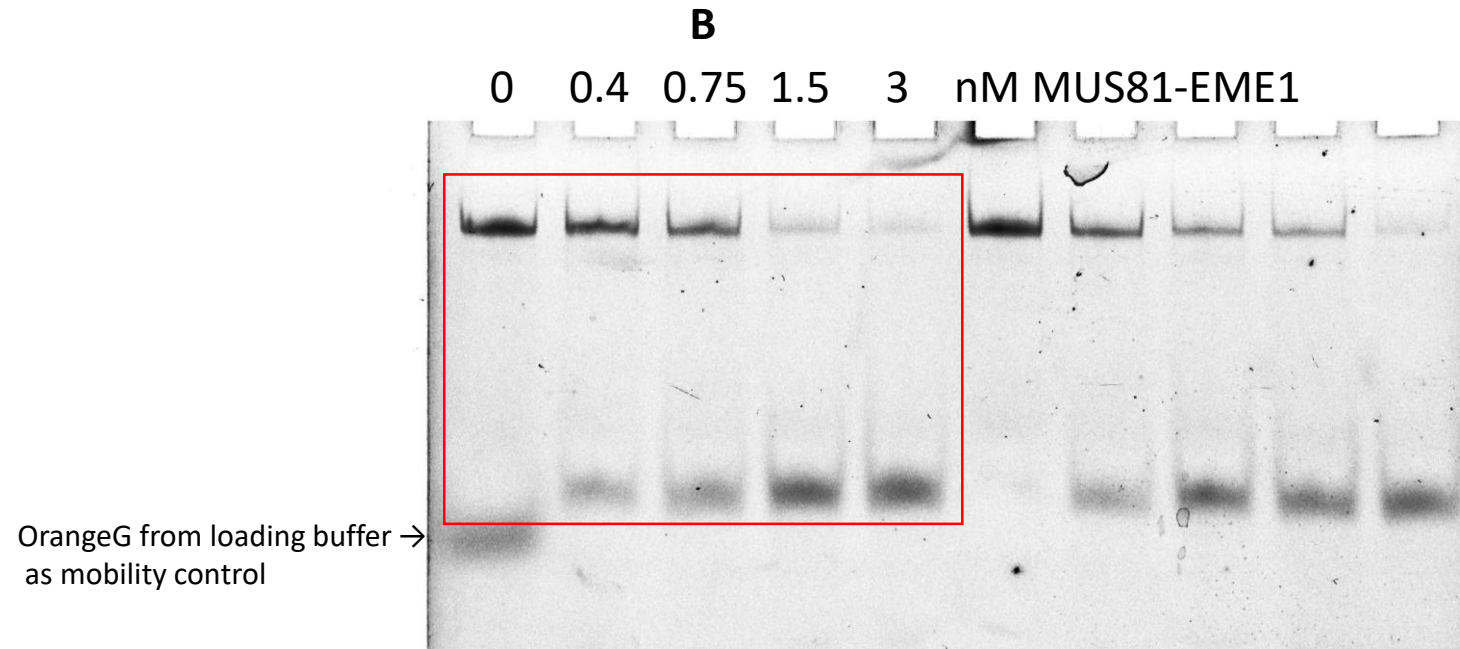

Figure 1

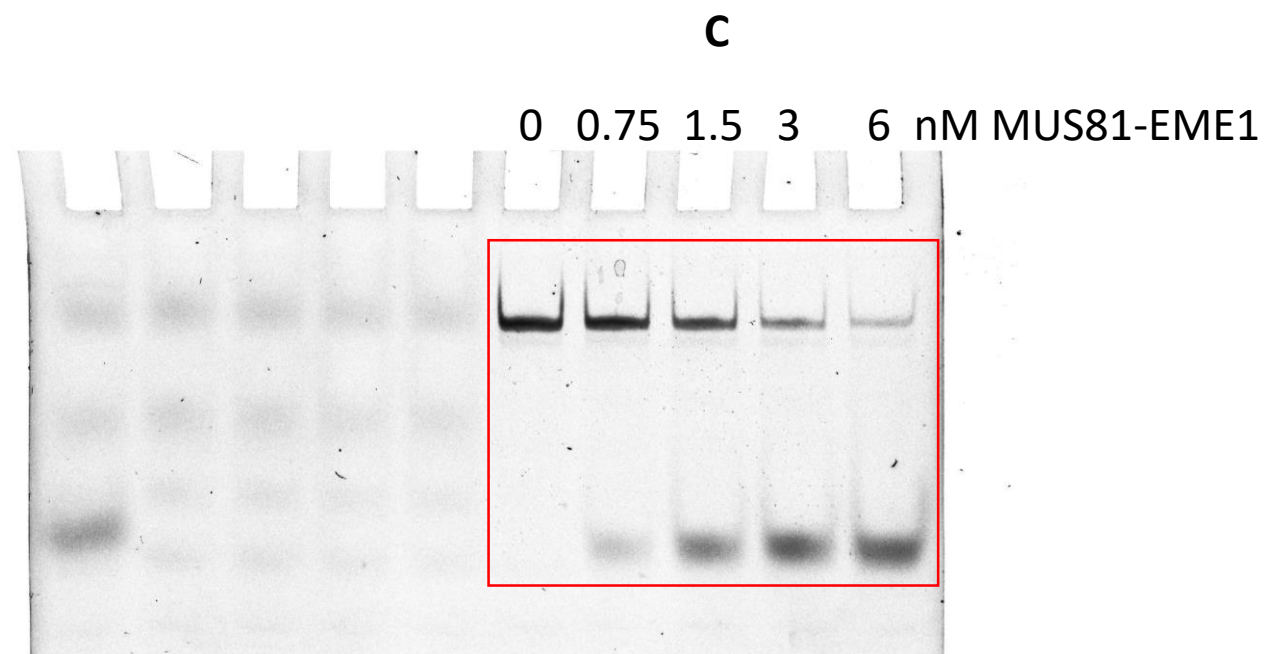





Figure 2A

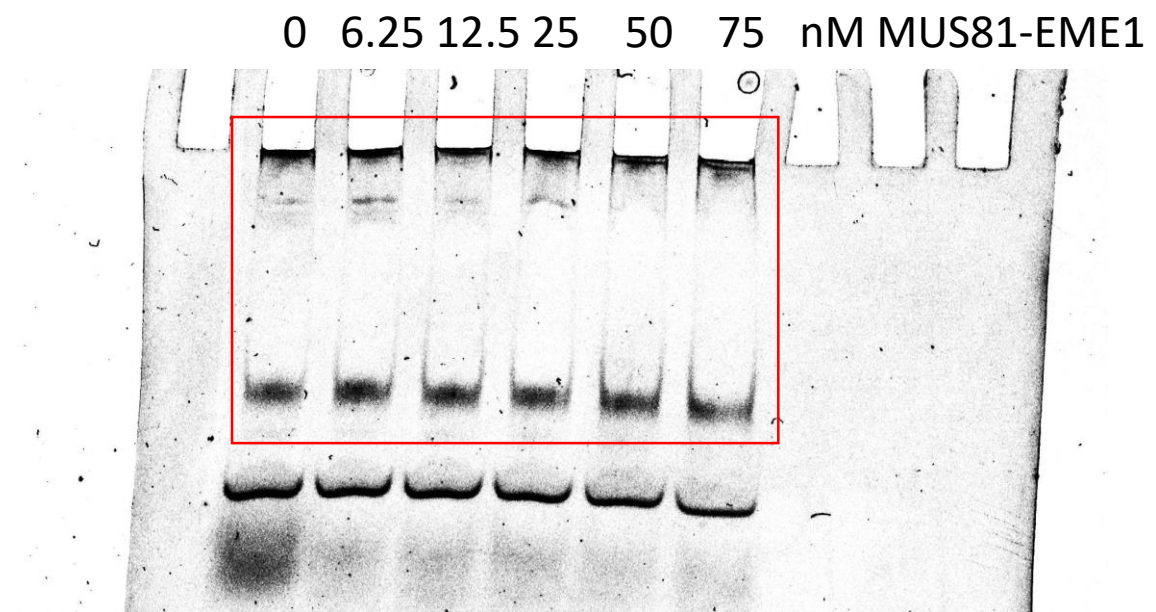

Figure 2B

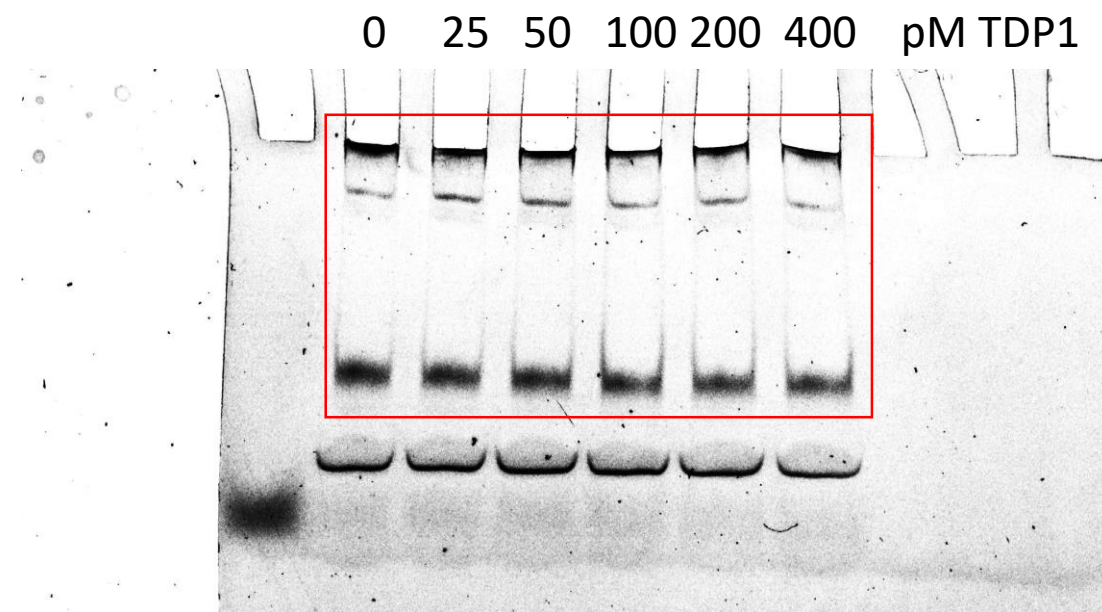



Figure 3A

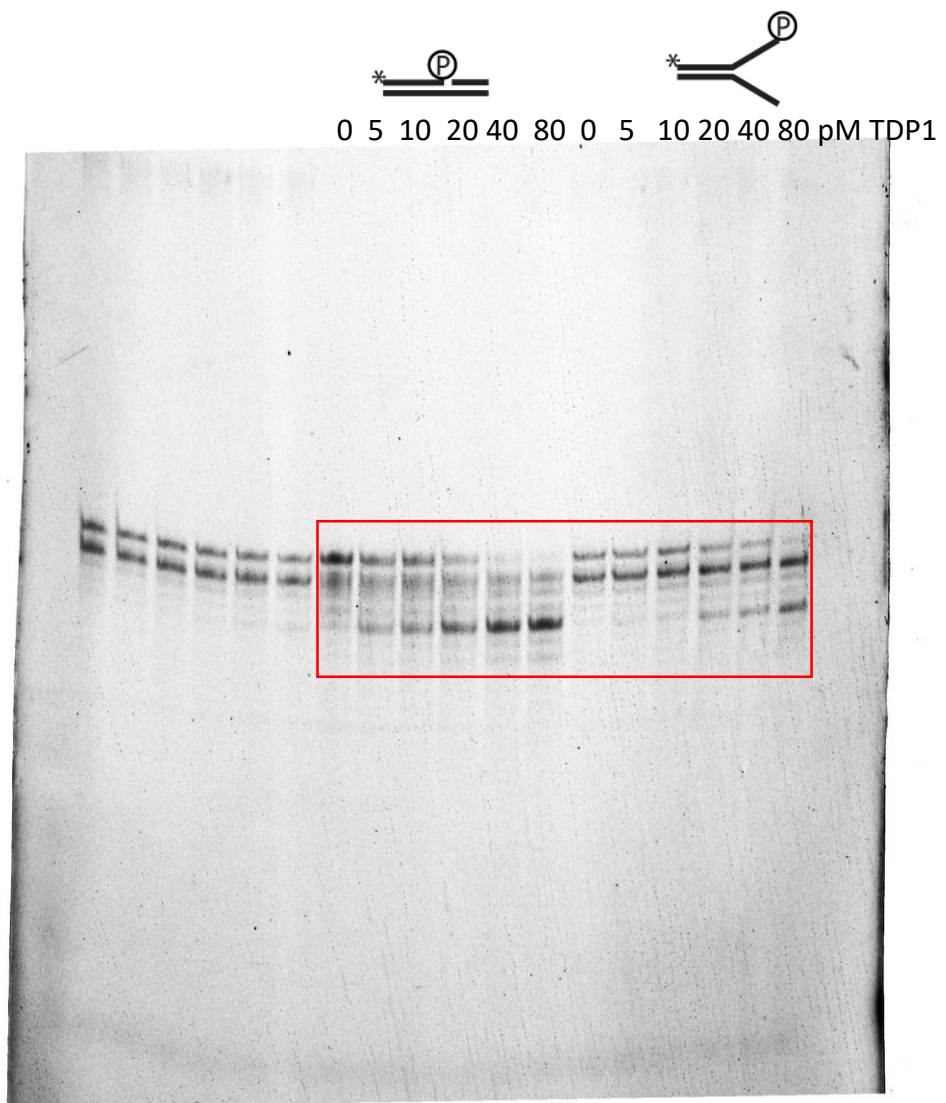

Figure 3A

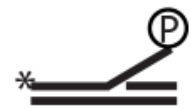

0 5 10 20 40 80 pM TDP1

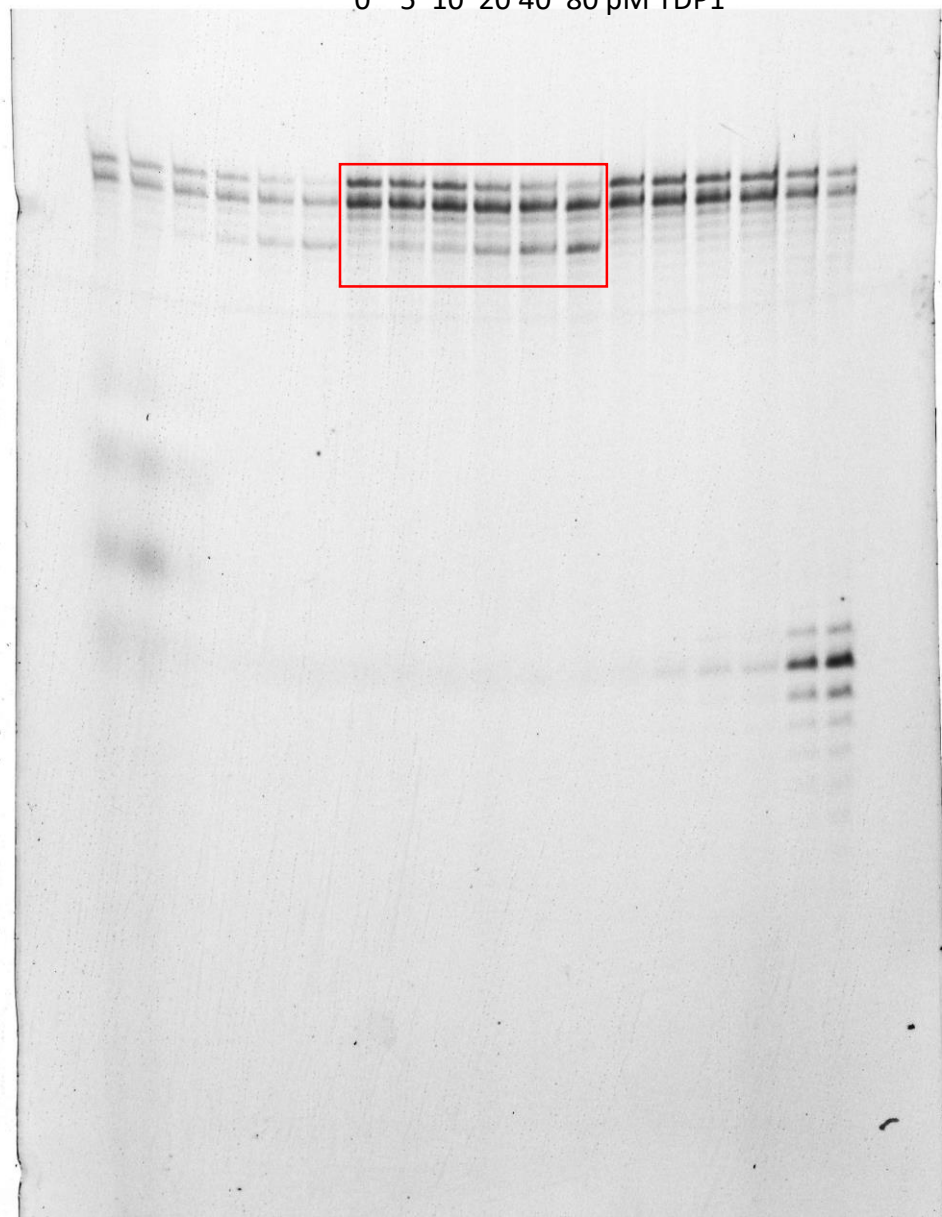

Figure 3B

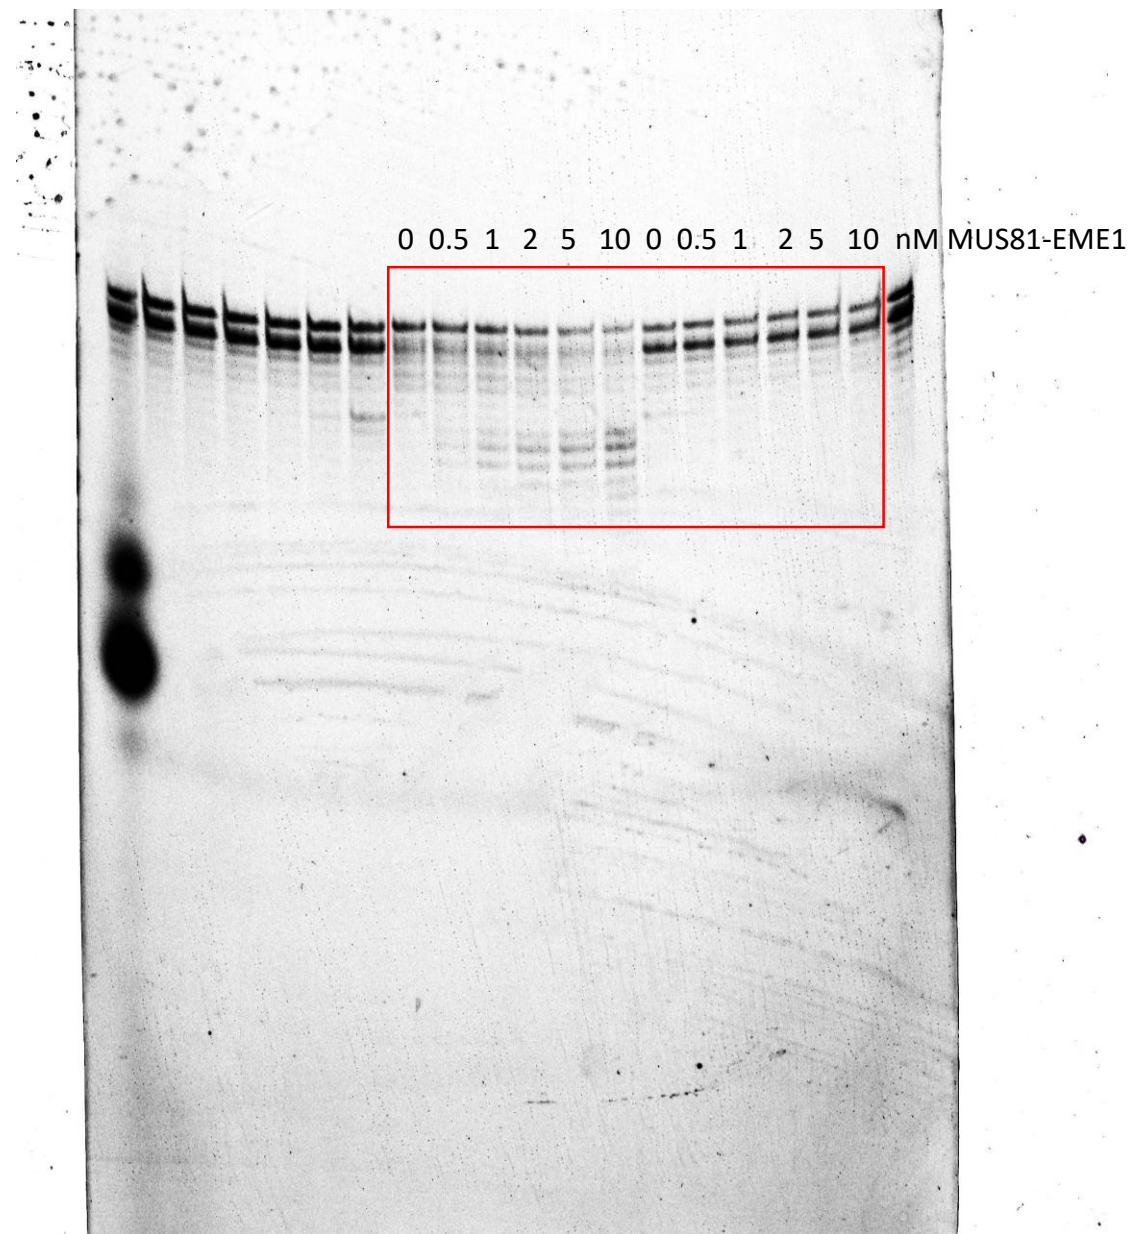

**Figure 3C**

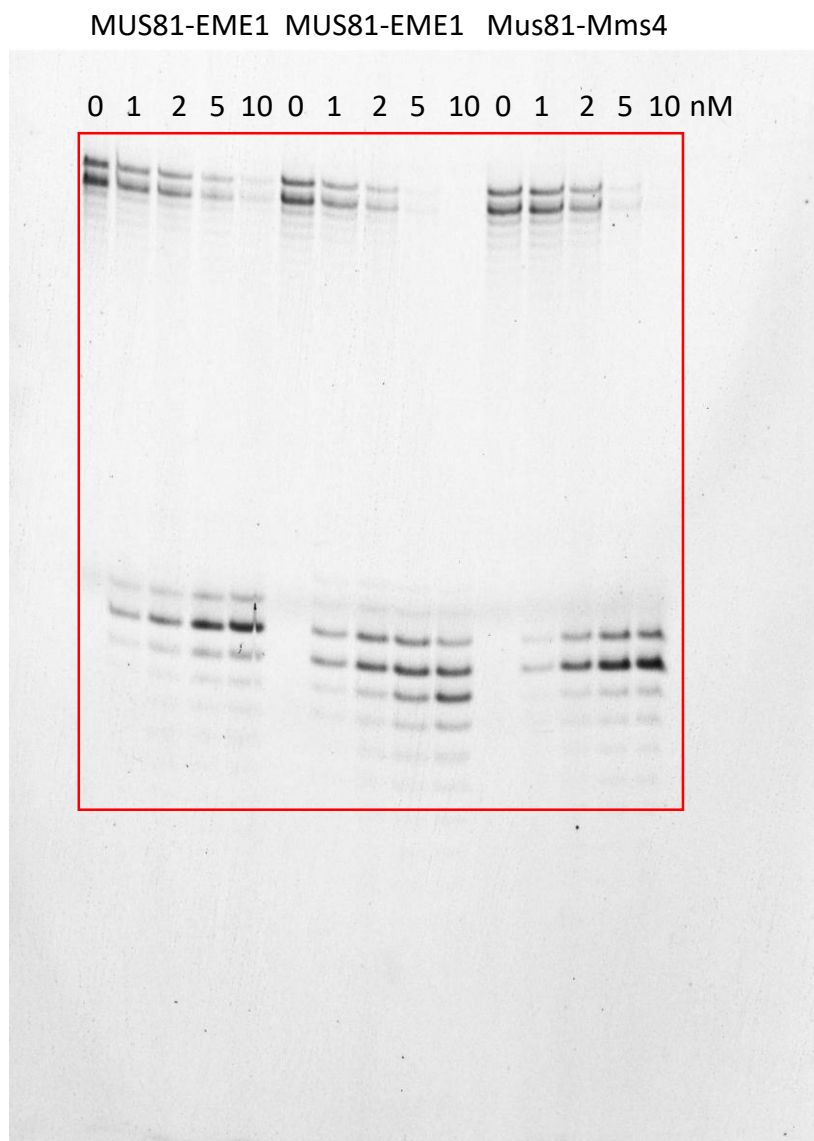

**Figure 4A**

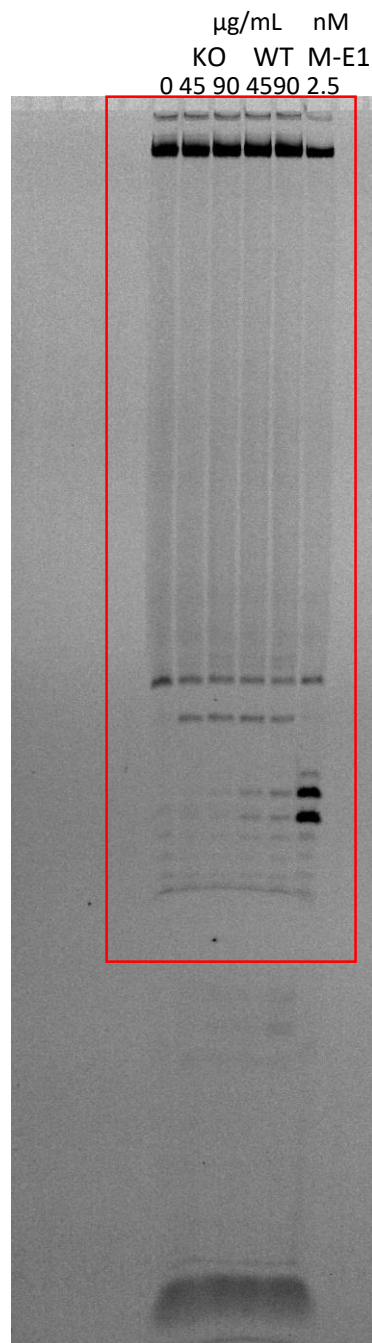

**Figure 5A**

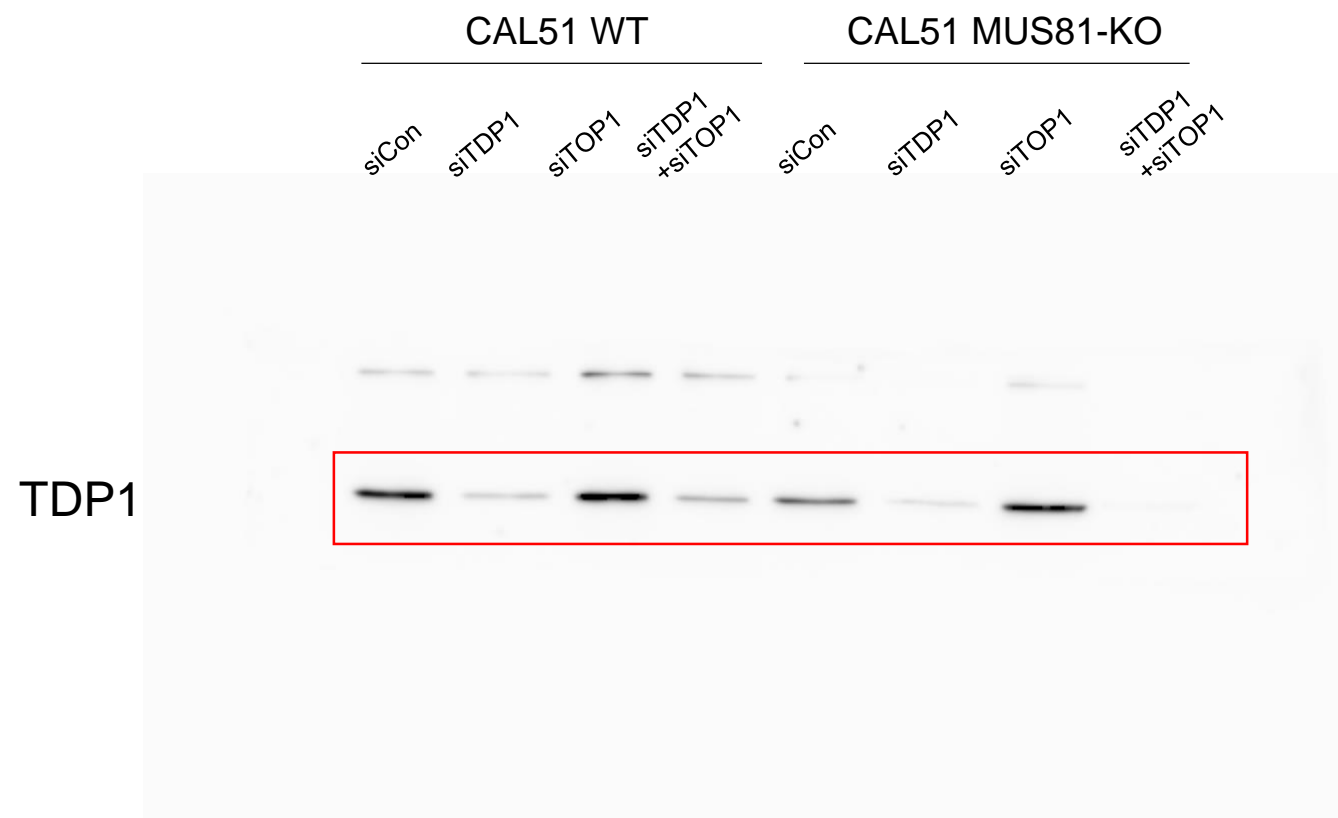



**Figure 5A**

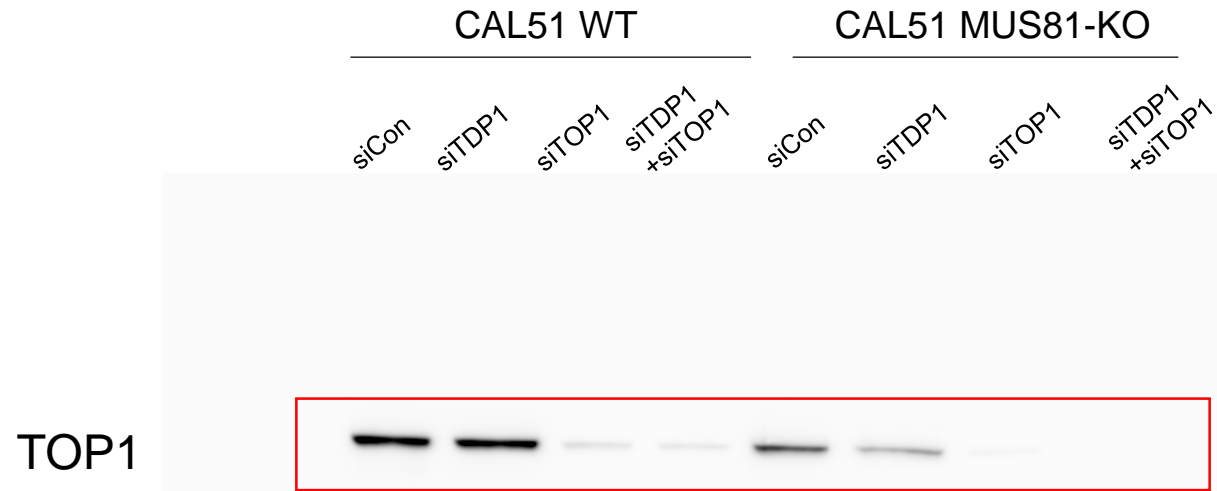

Figure 5A

Reblot after TOP1

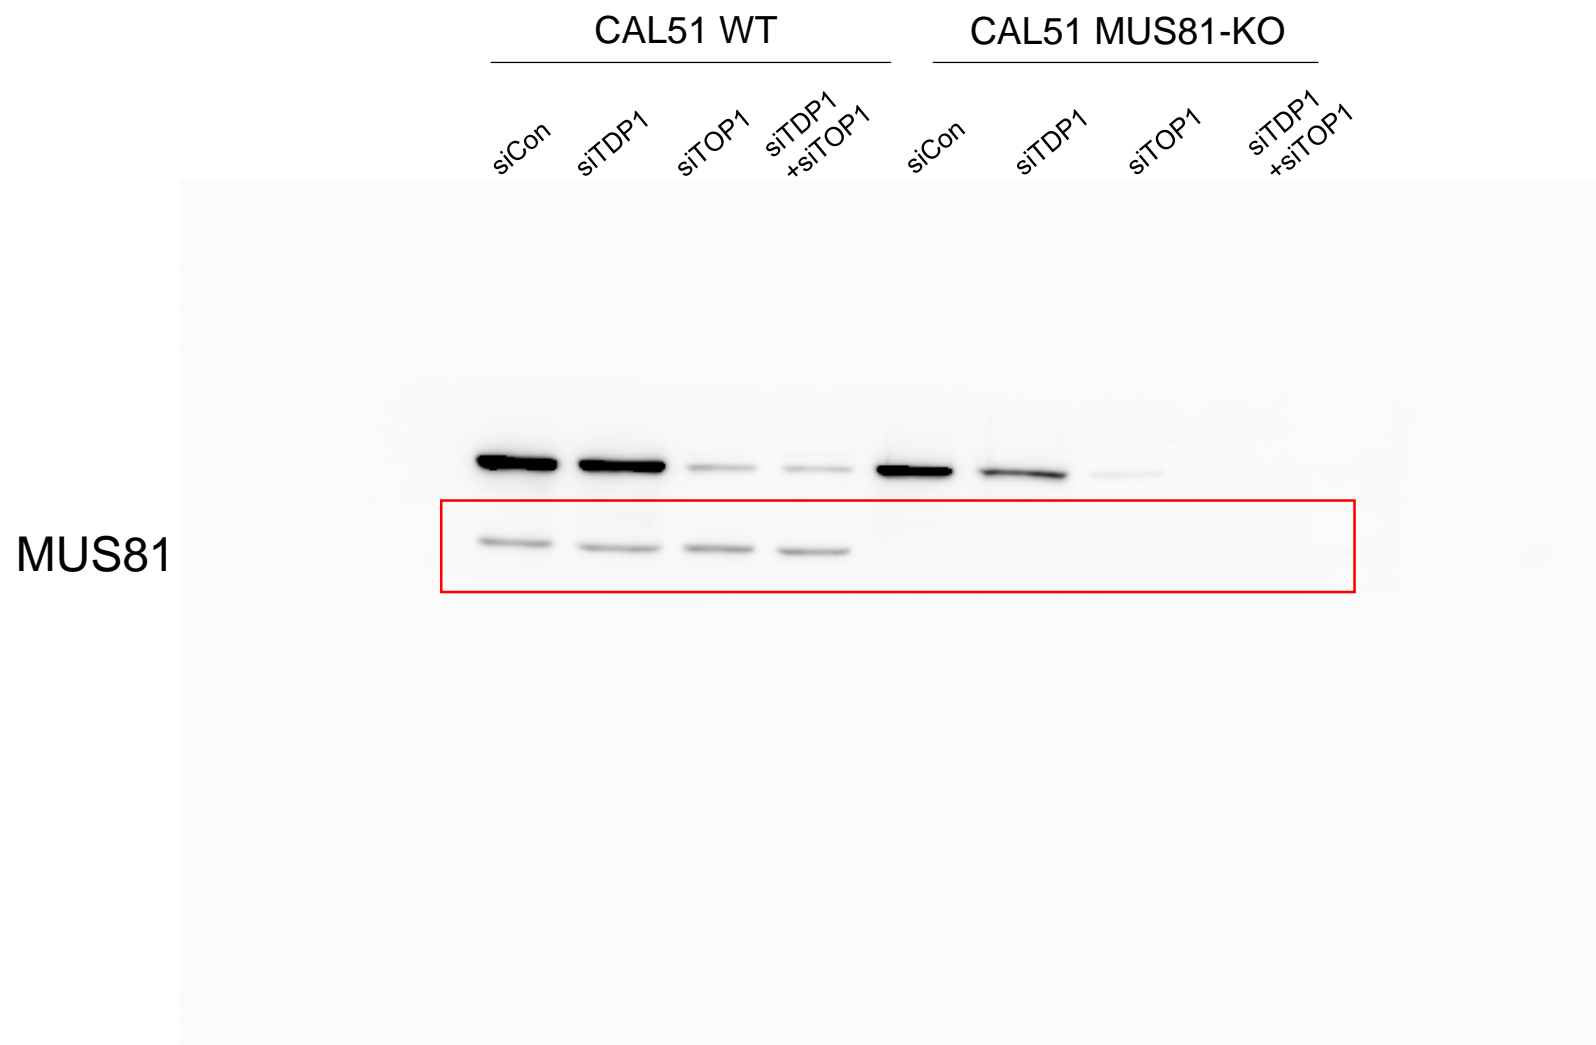

**Figure 5A**

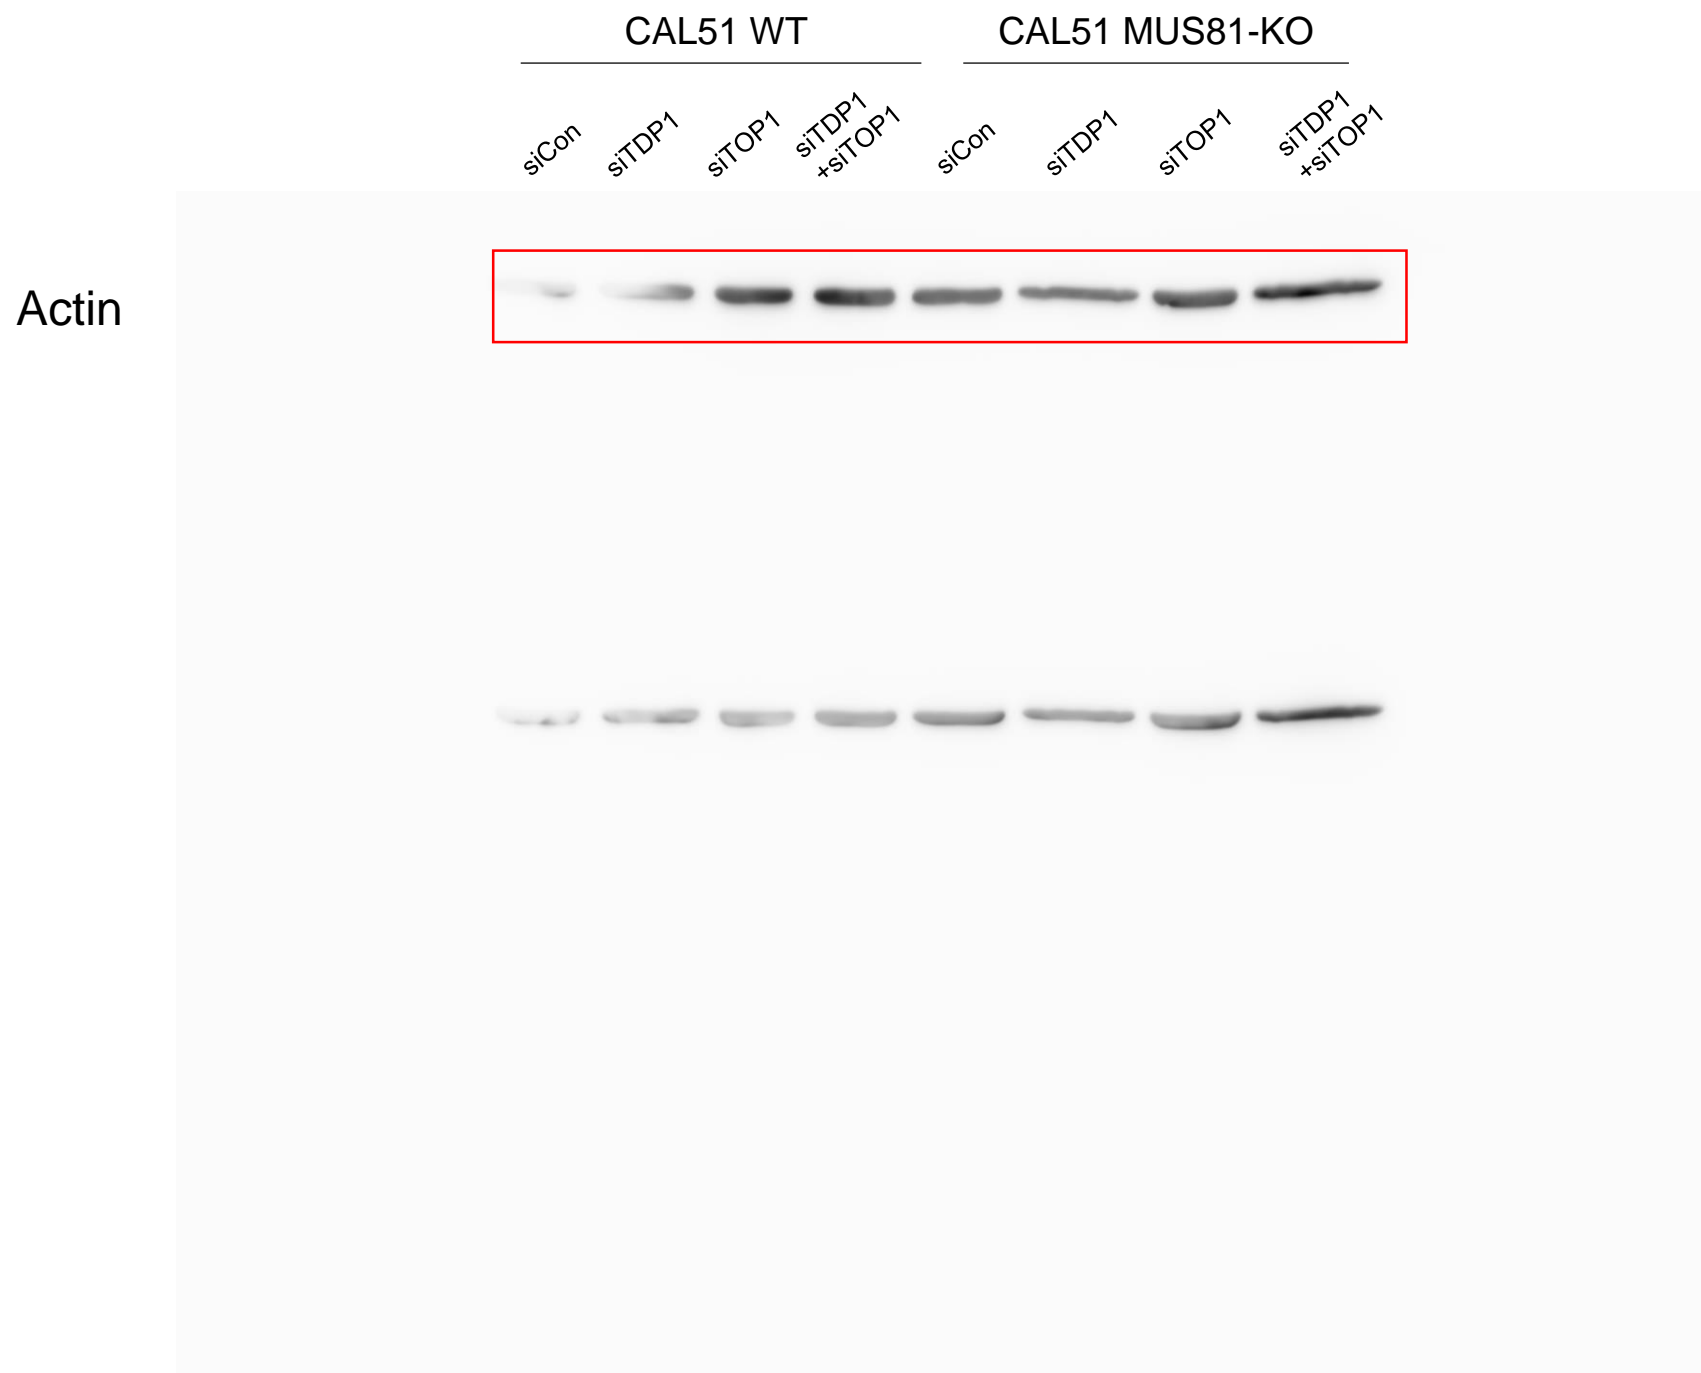

Figure S2A

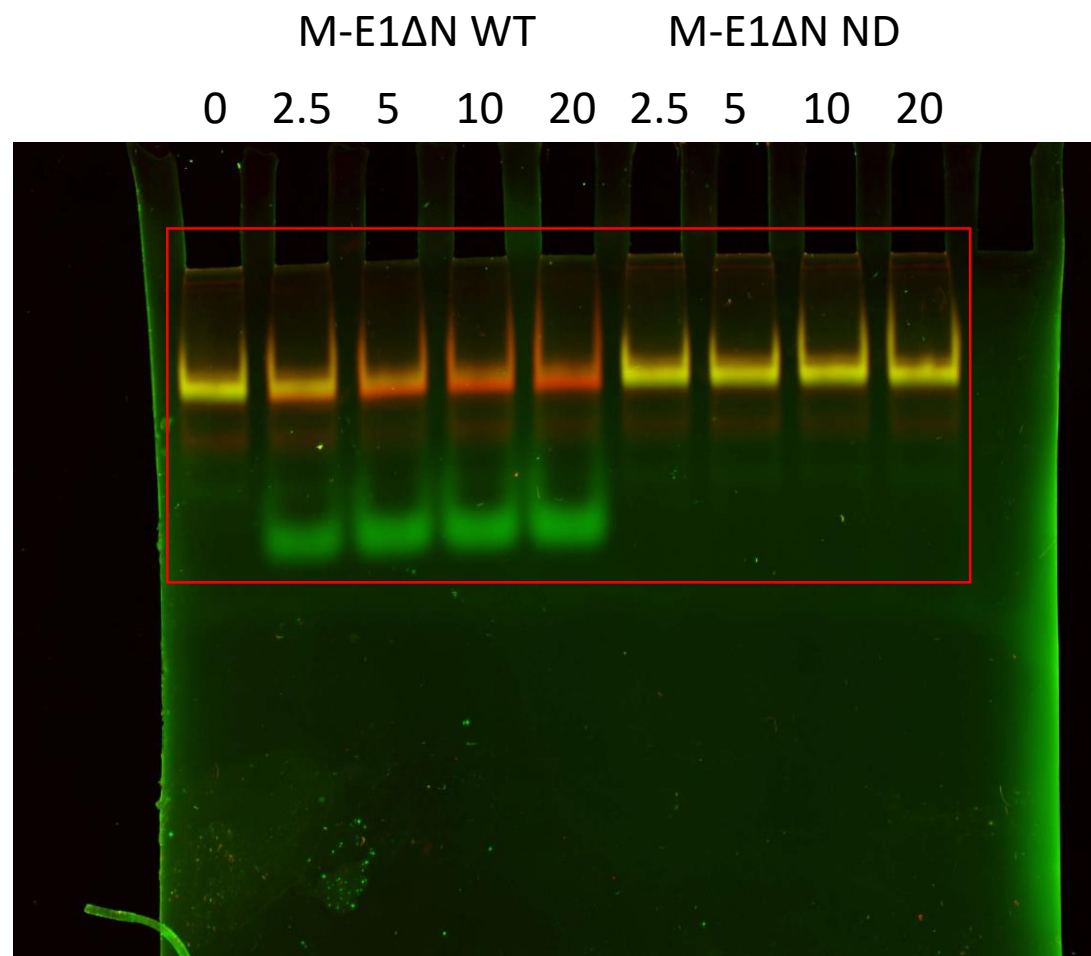

**Figure S2B**

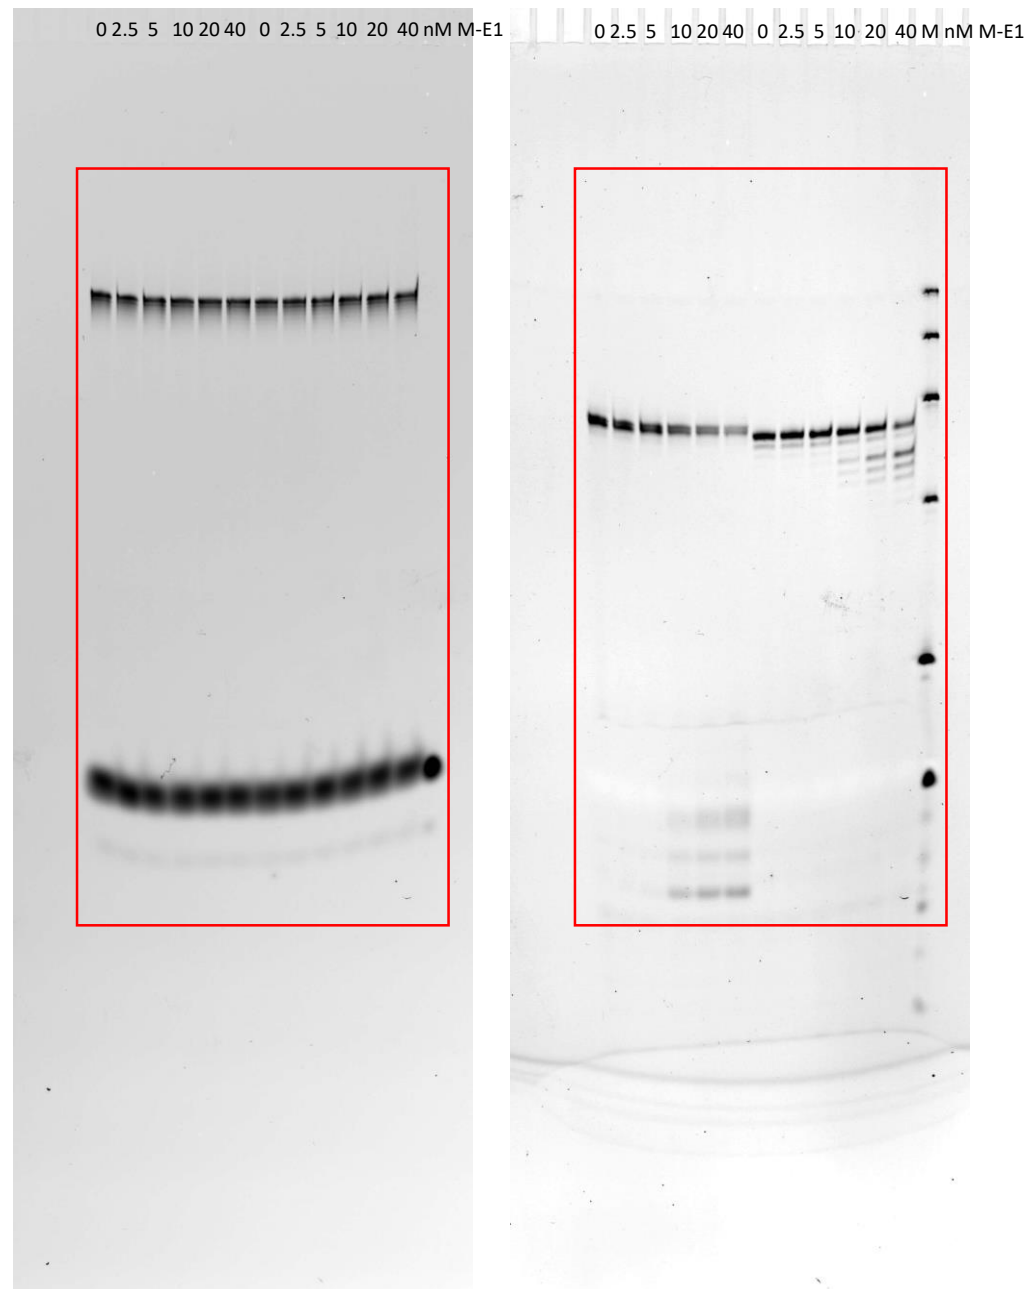

**Figure S3C**

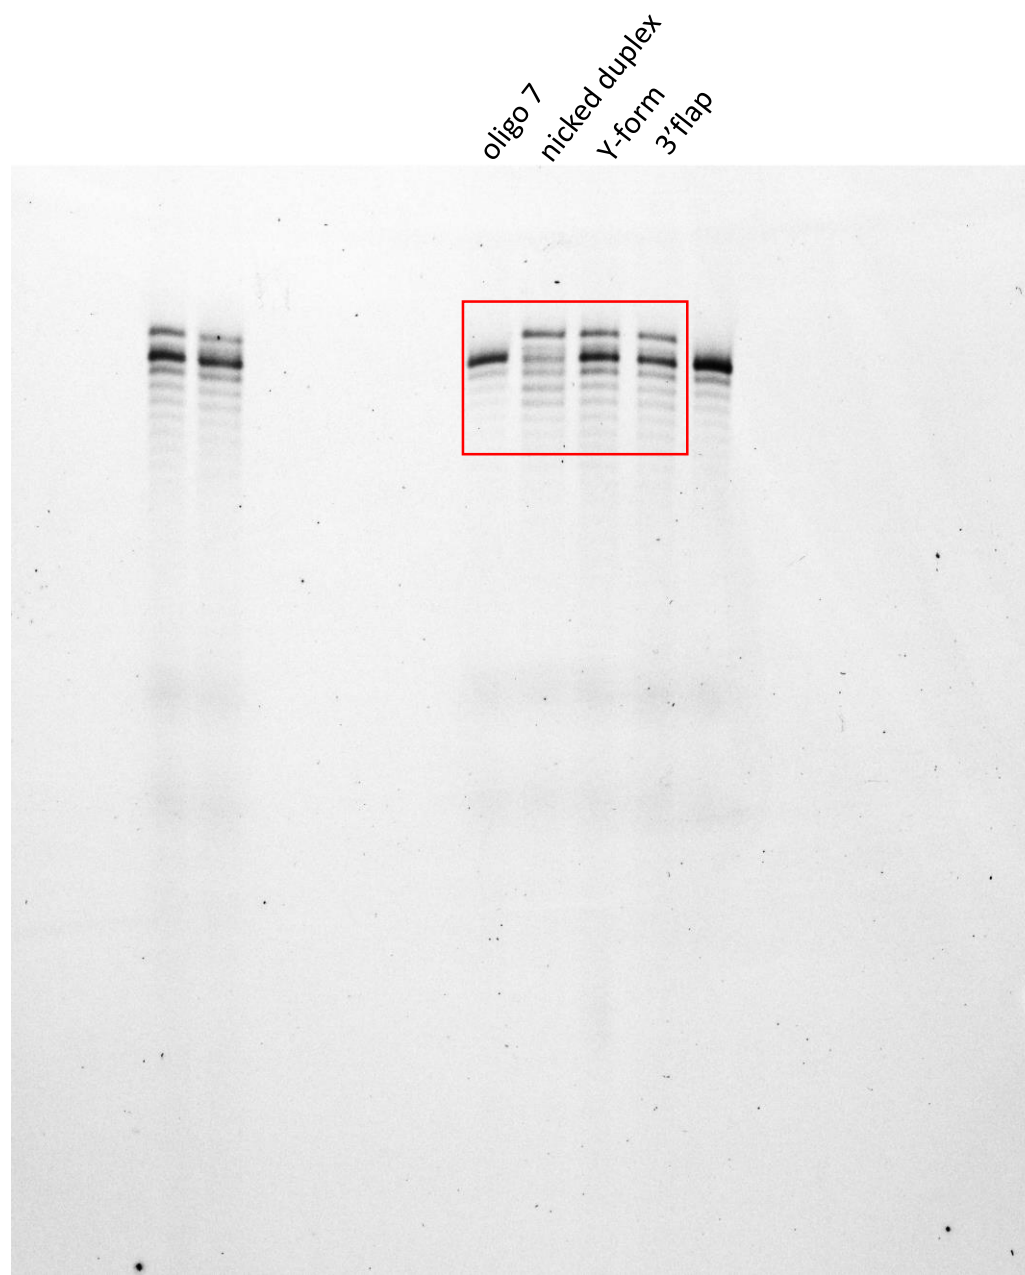





Figure S6A

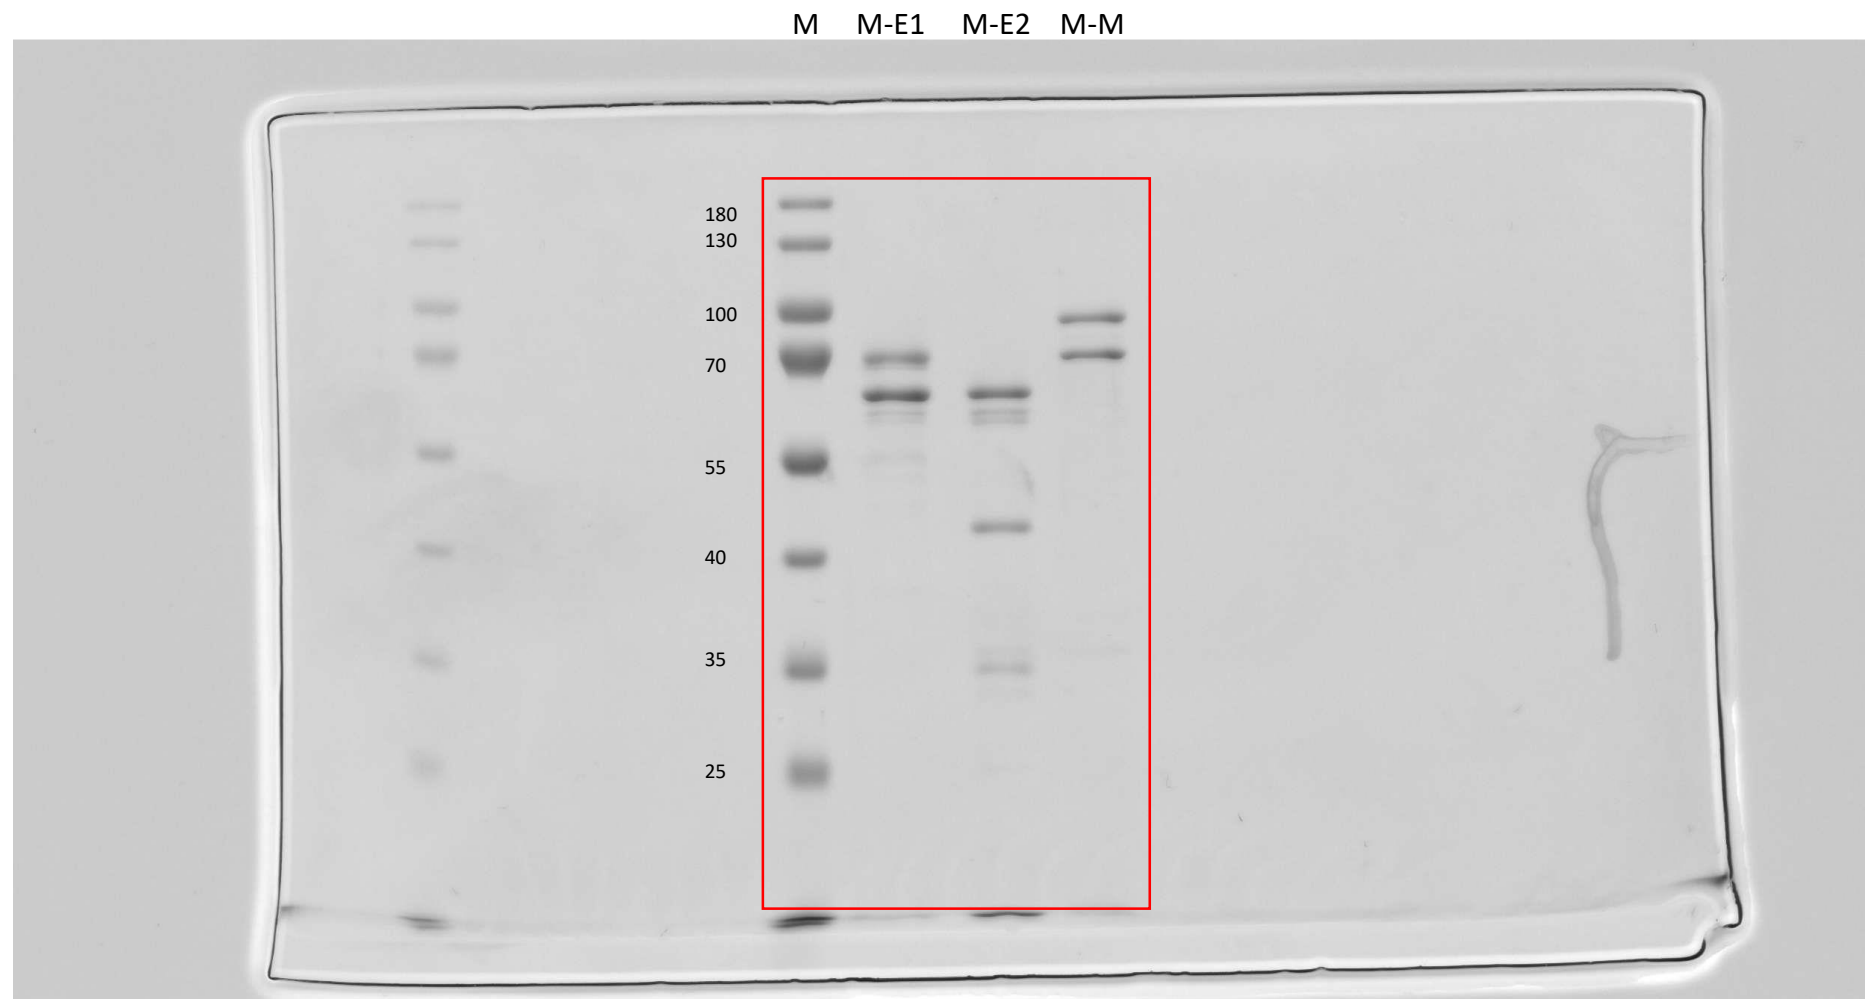

Figure S6B

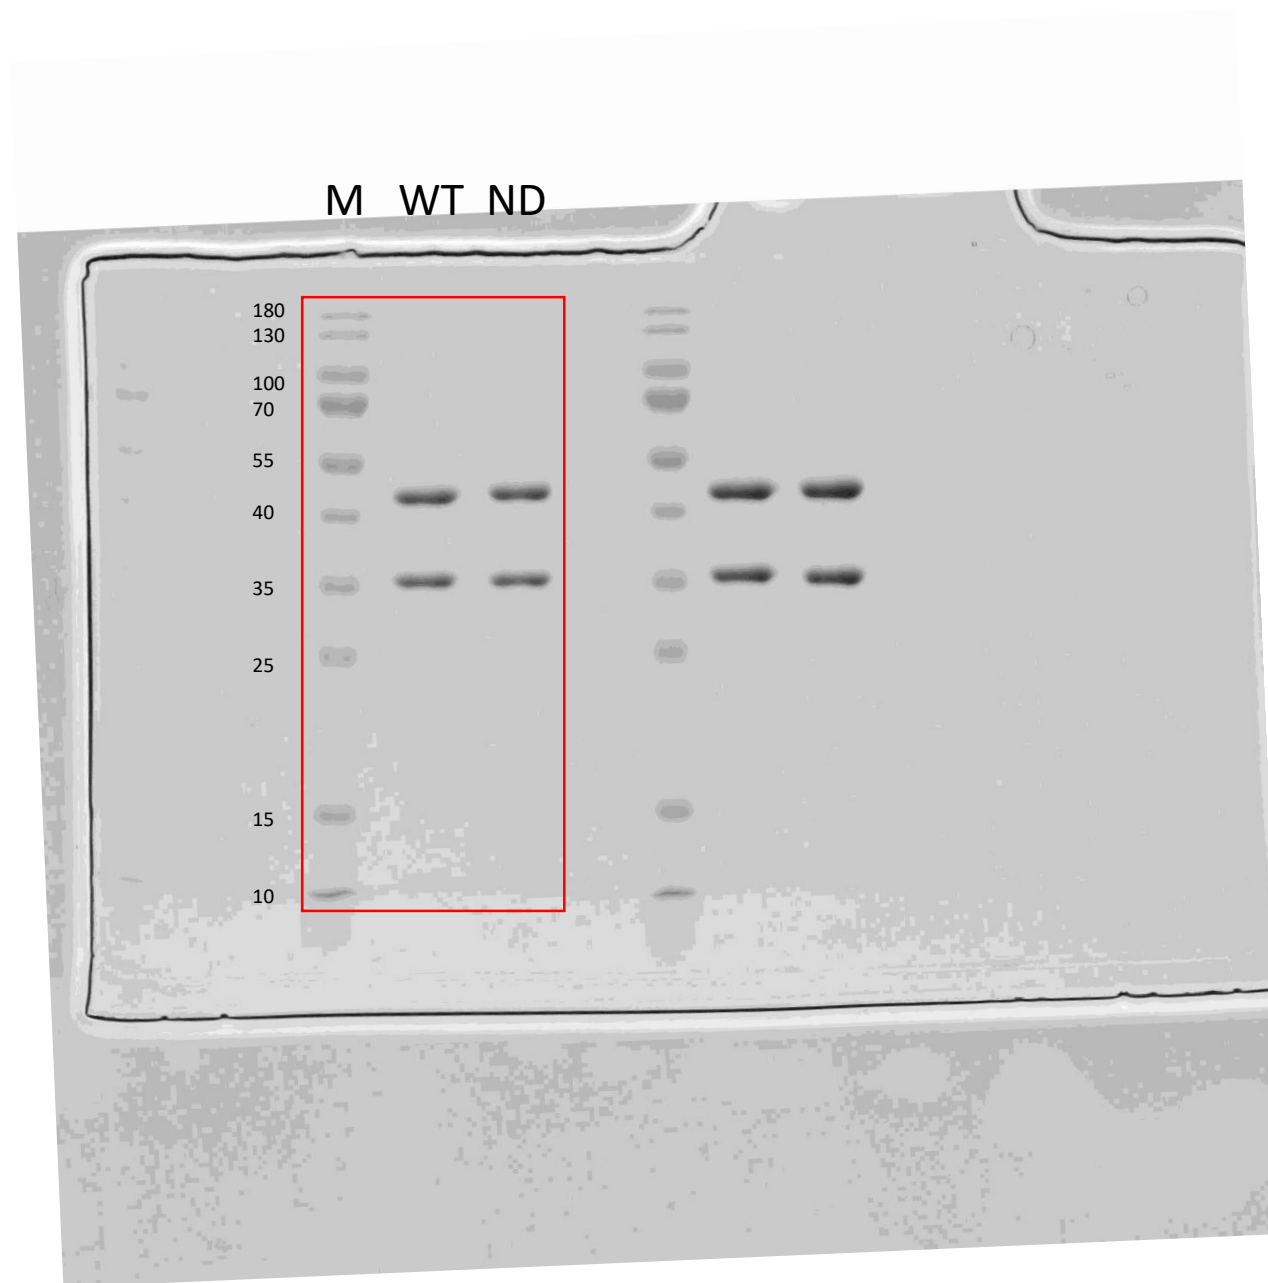

Supplement: 12915_2023_1614_MOESM9_ESM.pdf [file 12915_2023_1614_MOESM9_ESM.pdf]
